# Supplementary material for: Photocatalytic inactivation of bioaerosols in a fixed-bed reactor with TiO2-coated glass rings
Source: Royal Society of Chemistry journal article supplement (doi:10.1039/c8pp00297e), 2018-10-30
Supplement: c8pp00297e1.pdf [file c8pp00297e1.pdf]

### Supplementary Information.

#### Photocatalytic inactivation of bioaerosols in a fixed-bed reactor with TiO<sub>2</sub>-coated glass rings

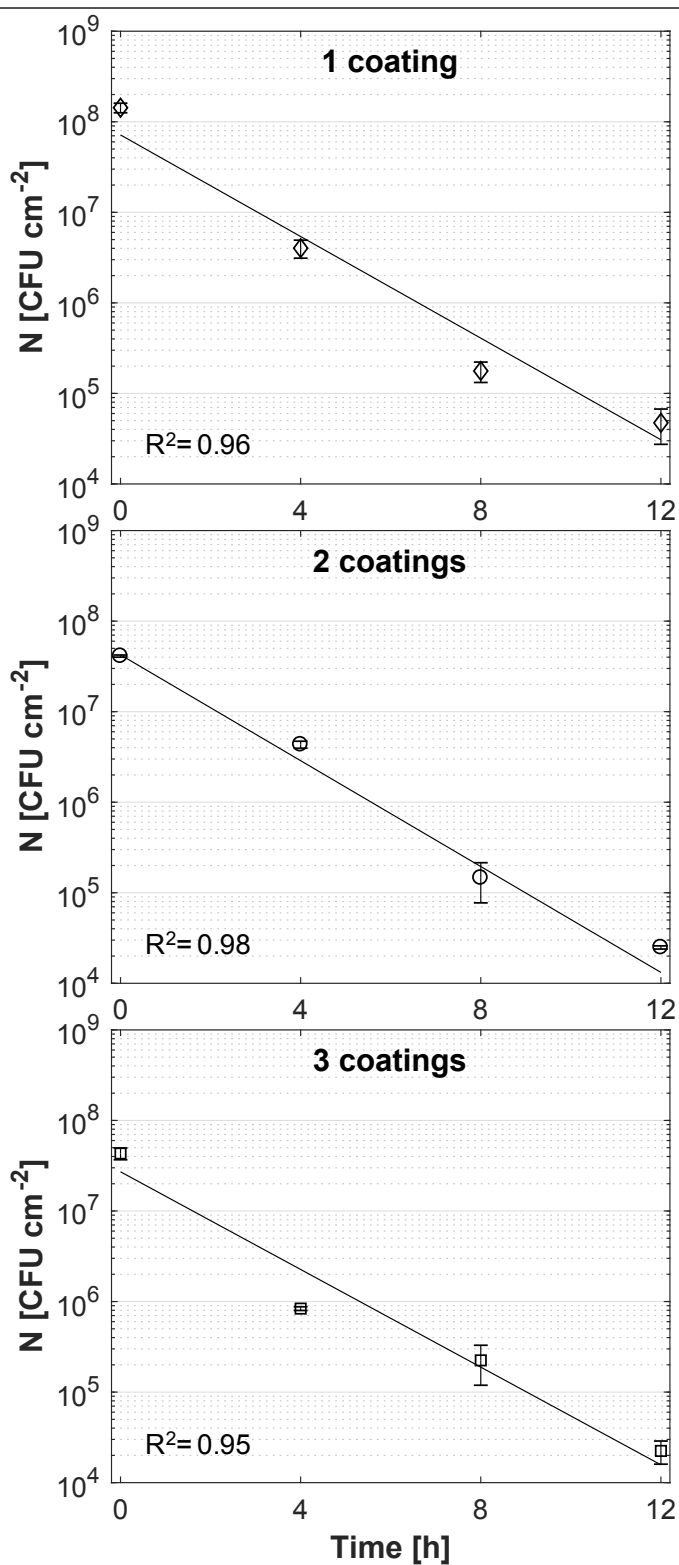

**Figure S1.** *B. subtilis* inactivation curves in the static reactor under 70% RH. Error bars represent 99% confidence interval.

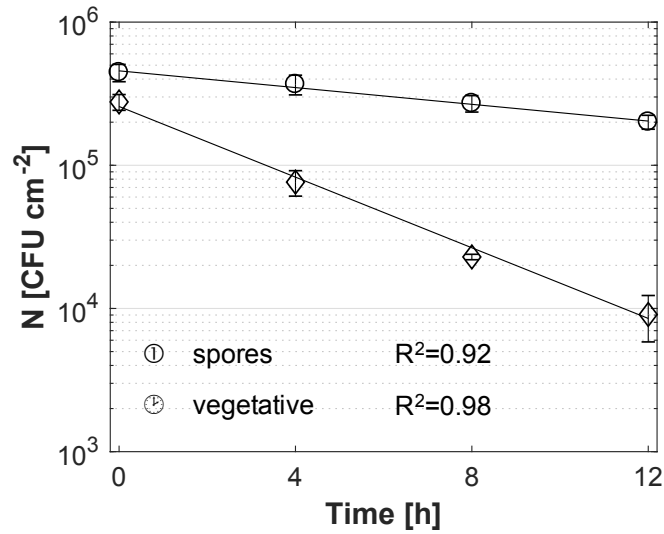

**Figure S2.** *B. subtilis* inactivation curves in the fixed-bed reactor. Error bars represent 99% confidence interval.

**Table S1.** Control experiments of viability of bacterial spores over glass rings.

| Experimental conditions |                               |                                    |                               |          |                               |
|-------------------------|-------------------------------|------------------------------------|-------------------------------|----------|-------------------------------|
| Under UV radiation      |                               |                                    | Absence of UV radiation       |          |                               |
| over uncoated rings     |                               | over TiO <sub>2</sub> coated rings | over uncoated rings           |          |                               |
| Time [h]                | N [CFU cm <sup>-2</sup> ]     | Time [h]                           | N [CFU cm <sup>-2</sup> ]     | Time [h] | N [CFU cm <sup>-2</sup> ]     |
| 0                       | (1.5 ± 0.5) × 10 <sup>5</sup> | 0                                  | (1.5 ± 0.5) × 10 <sup>5</sup> | 0        | (1.5 ± 0.5) × 10 <sup>5</sup> |
| 8                       | (3.1 ± 0.7) × 10 <sup>5</sup> | 24                                 | (2.4 ± 0.5) × 10 <sup>5</sup> | 24       | (1.2 ± 0.4) × 10 <sup>5</sup> |
